# Supplementary material for: Silencing of long non-coding RNA H19 downregulates CTCF to protect against atherosclerosis by upregulating PKD1 expression in ApoE knockout mice
Source: publisher site journal article supplement (doi:10.18632/aging.102388), 2019-11-22
Supplement: Supplementary file [file aging-v11i22-102388-supplementary-material-SD1.pdf]

## SUPPLEMENTARY FIGURES

Whole membranes with molecular weights for the polycystin-1 Westerns in Figure 3C

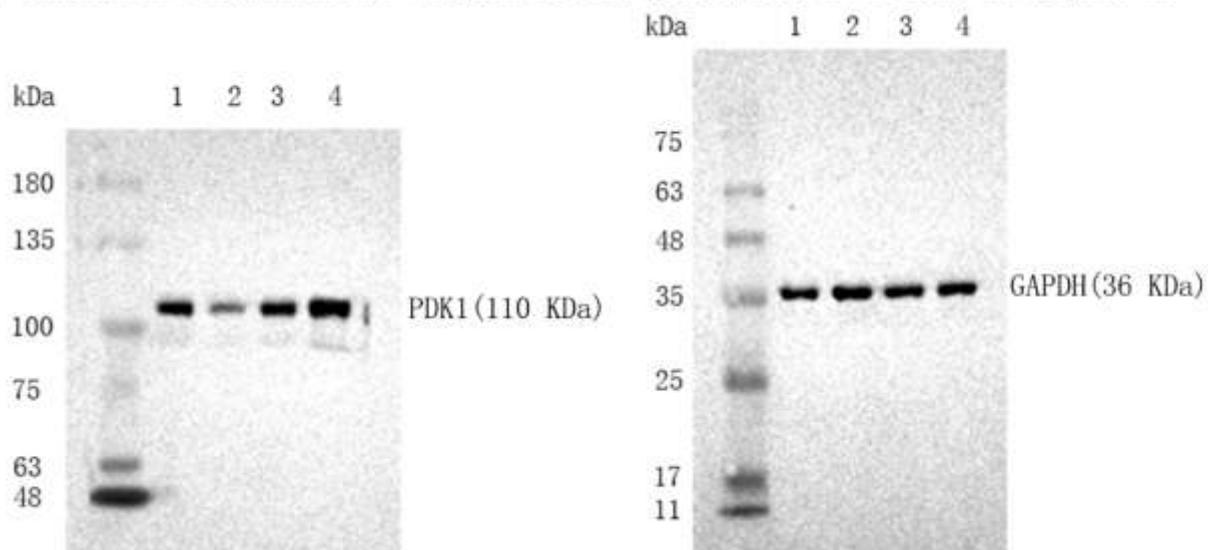

Supplementary Figure 1. Whole membranes with molecular weights for the polycystin-1 westerns in Figure 3C.

Whole membranes with molecular weights for the polycystin-1 Westerns in Figure 4G

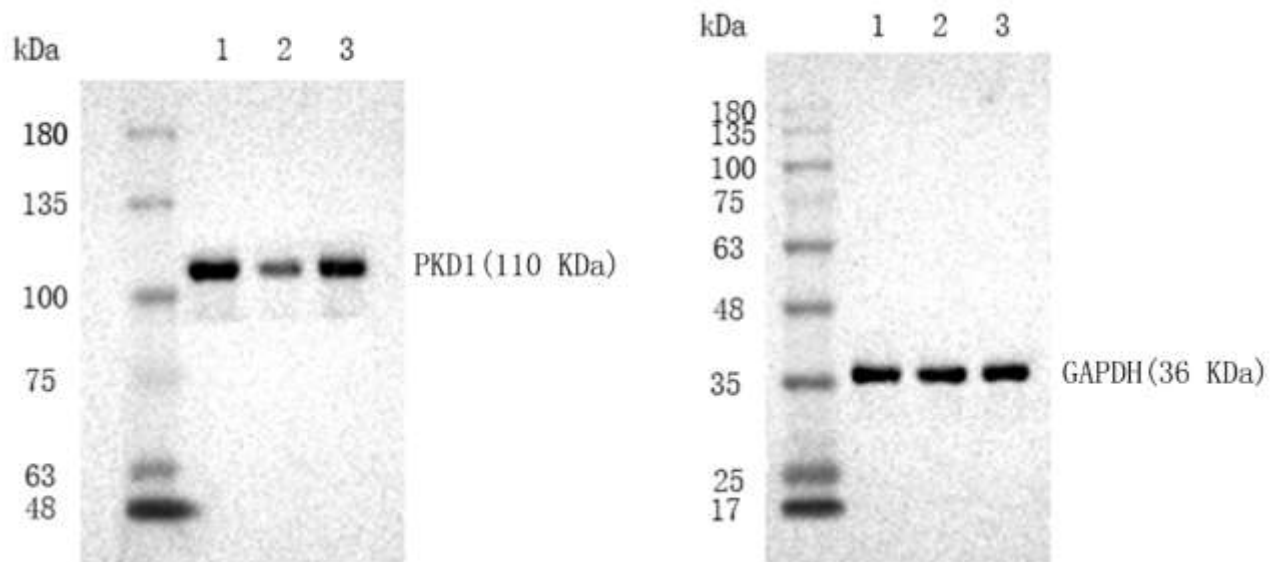

Supplementary Figure 2. Whole membranes with molecular weights for the polycystin-1 westerns in Figure 4G.
